# Supplementary material for: Mindfulness is associated with the weight status, severity of disease, and severity of extra-intestinal symptoms among individuals with irritable bowel syndrome
Source: Frontiers journal article supplement (doi:10.3389/fpsyg.2025.1545033), 2025-04-25
Supplement: Data_Sheet_2.pdf [file Data_Sheet_2.pdf]

| IBS extra-intestinal symptom severity scale (IBS-EISSS) |                                  |       |          |     |           |       |                  |        |
|---------------------------------------------------------|----------------------------------|-------|----------|-----|-----------|-------|------------------|--------|
|                                                         | Item                             | never | very low | low | sometimes | a lot | most of the time | always |
| 1                                                       | Nausea/vomiting                  |       |          |     |           |       |                  |        |
| 2                                                       | Early satiety                    |       |          |     |           |       |                  |        |
| 3                                                       | Headache                         |       |          |     |           |       |                  |        |
| 4                                                       | Back pain                        |       |          |     |           |       |                  |        |
| 5                                                       | Fatigue                          |       |          |     |           |       |                  |        |
| 6                                                       | Excessive throat gas             |       |          |     |           |       |                  |        |
| 7                                                       | Excessive intestinal gas         |       |          |     |           |       |                  |        |
| 8                                                       | Heartburn                        |       |          |     |           |       |                  |        |
| 9                                                       | Urgency to defecate              |       |          |     |           |       |                  |        |
| 10                                                      | Straining to defecate            |       |          |     |           |       |                  |        |
| 11                                                      | Feeling of incomplete defecation |       |          |     |           |       |                  |        |
| 12                                                      | Urgency to defecate urine        |       |          |     |           |       |                  |        |
| 13                                                      | Leg pain                         |       |          |     |           |       |                  |        |
| 14                                                      | Muscle or joint pain             |       |          |     |           |       |                  |        |
| 15                                                      | Postprandial fullness            |       |          |     |           |       |                  |        |
